# Supplementary material for: Parental perspectives on retention and secondary use of neonatal dried bloodspots: a Dutch mixed methods study
Source: Springer Nature journal article supplement (doi:10.1186/s12887-019-1590-8), 2019-07-09
Supplement: MOESM3 [file 16910526]

### **Additional file 3**

#### **Parental perspectives on retention and secondary use of neonatal dried bloodspots: a Dutch mixed methods study**

Marleen E. Jansen PhD, Lion J.M. van den Bosch MSc, Marjolein J. Hendriks MSc, Mariska M.J. Scheffer MSc, Marie-Louise Heijnen PhD, Conor M.W. Douglas PhD, Carla G. van El PhD

#### **Interview Data Coding Scheme**

##### **1. Ethics**

###### 1.1. Transparency

###### 1.1.1. Sharing information about the use of RDBS

###### 1.1.2. Sharing information about the storage of RDBS

###### 1.2. Altruism

###### 1.3. Autonomy

###### 1.4. Privacy

###### 1.5. Anonymity

###### 1.5.1. Use of personal information during research RDBS

###### 1.5.2. Use of personal information results secondary use RDBS

##### **2. Knowledge**

###### 2.1. Knowledge on newborn screening

###### 2.2. Knowledge about secondary use of RDBS

###### 2.3. Knowledge on retention period RDBS

###### 2.4. Knowledge on management RDBS

##### **3. Trust**

###### 3.1. Trust in use RDBS

###### 3.1.1. Trust in the authority storing RDBS

###### 3.1.2. Trust in universities using RDBS

###### 3.1.3. Trust in companies using RDBS

###### 3.2. Trust in storage RDBS

###### 3.3. Trust in decision making use RDBS

##### **4. Perceived risk**

###### 4.1. Negative aspects secondary use RDBS

###### 4.2. Negative aspects prolonged retention

###### 4.3. Negative aspects management RDBS

## **5. Perceived benefit**

### 5.1. Positive aspects secondary use RDBS

- 5.1.1. Promotion individual health
- 5.1.2. Promotion public health
- 5.1.3. Increase of knowledge

### 5.2. Positive aspects prolonged retention

- 5.2.1. Promotion individual health
- 5.2.2. Promotion public health
- 5.2.3. No sample 'squandering'

### 5.3. Positive aspects management RDBS

## **6. Personal control**

### 6.1. Want to give permission secondary use RDBS

### 6.2. Personal control in decision making process secondary use

### 6.3. Public control in decision making process secondary use

### 6.4. Receiving information

- 6.4.1. Wanting to receive information about the results of initial screening
- 6.4.2. Wanting to receive information about the moment of use RDBS
- 6.4.3. Wanting to receive information about the results RDBS use

## **7. Attitude**

### 7.1. Attitude towards newborn screening

### 7.2. Attitude towards consent procedure

### 7.3. Attitude towards RDBS of newborn screening

- 7.3.1. Attitude towards the retention period RDBS
- 7.3.2. Attitude towards secondary RDBS use in general
- 7.3.3. Attitude towards extended research uses RDBS
- 7.3.4. Attitude towards management RDBS
- 7.3.5. Attitude towards decision making

## **8. Others**

### 8.1. Experience with newborn screening

### 8.2. Involvement

(total: 56 codes)
